# Supplementary material
Source: HighWire-hosted journal article supplement (https://bmjopen.bmj.com/content/6/10/e012219)
Supplement: inline-supplementary-material-1 [file inline-supplementary-material-1.pdf]

## Informed consent form

Day-case versus inpatient cochlear implantation: a randomized controlled trial.

- I have received and read the information brochure (version number 4, 11-03-2015) for participants. I understand the information that is written in the brochure. I had the opportunity to ask additional questions. These questions were answered adequately. I have had plenty of time to consider participation in this study;
- I am aware that participation is completely voluntary. I am aware that I have the possibility to withdraw participation at any moment, without any explanation;
- I am aware that my data are visible for some of the people involved in this study. These people include the researchers, monitors, auditors, etcetera;
- I give permission to use my data for the research purposes as described in the information brochure;
- I am aware that my data will be stored for 15 years following this study and will be destroyed after these 15 years;
- I give the researchers permission to inform my general practitioner about my participation in this study;
- I **will / will not**\* give permission to contact me in the future (after this study) and ask me for participation in additional or new research projects;
- I **do / do not**\* want to be informed about the results of this study;
- I agree to participate in this research project.

Name participant:

Signature:

Date: \_\_ / \_\_ / \_\_

---

I hereby declare that I have fully informed the participant about this research project. I will inform the participant in case of new insight information that could affect the participant's consent. I will inform the participant in a timely manner.

Name researcher:

Signature:

Date: \_\_ / \_\_ / \_\_
