# Supplementary material
Source: HighWire-hosted journal article supplement (https://bmjopen.bmj.com/content/6/10/e012219)
Supplement: inline-supplementary-material-2 [file inline-supplementary-material-2.pdf]

## Utrecht patient satisfaction survey

### ***Day-case cochlear implantation***

Day-case surgery means that you have been admitted one day before or the day of surgery and have been discharged the day of the surgery.

|    |                                                                                                                                                                                                                                        |     |    |
|----|----------------------------------------------------------------------------------------------------------------------------------------------------------------------------------------------------------------------------------------|-----|----|
| 1. | Did you feel more anxious because the surgery was planned in a day-case setting?                                                                                                                                                       | Yes | No |
| 2. | Did you feel less anxious because the surgery was planned in a day-case setting?                                                                                                                                                       | Yes | No |
| 4. | Did you find it pleasant that you did not have to spend the night in the hospital after the surgery?                                                                                                                                   | Yes | No |
| 3. | If you would have the choice: would you undergo the surgery in day-case setting again next time?                                                                                                                                       | Yes | No |
| 4. | Would you have preferred to have spend the night in the hospital after the surgery?                                                                                                                                                    | Yes | No |
| 5. | Would you have preferred to have been admitted the night prior to the surgery?                                                                                                                                                         | Yes | No |
| 6. | Were you content with the hospital admittance in general?                                                                                                                                                                              | Yes | No |
| 7. | How easy or difficult was the first night after the operation on a scale from 0 to 10 (0 is very easy and 10 is as difficult as possible)?<br><br>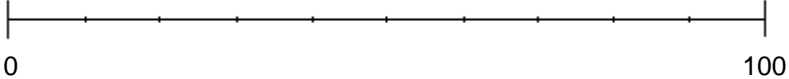 |     |    |

## Utrecht patient satisfaction survey

### *Inpatient cochlear implantation*

Inpatient surgery means that you have been admitted one day before or the day of surgery followed by one-day hospital admittance.

|    |                                                                                                                                                                                                                                        |     |    |
|----|----------------------------------------------------------------------------------------------------------------------------------------------------------------------------------------------------------------------------------------|-----|----|
| 1. | Did you feel more anxious because the surgery was planned in an inpatient setting?                                                                                                                                                     | Yes | No |
| 2. | Did you feel less anxious because the surgery was planned in an inpatient setting?                                                                                                                                                     | Yes | No |
| 4. | Did you find it pleasant that you had to spend the night in the hospital after the surgery?                                                                                                                                            | Yes | No |
| 3. | If you would have the choice: would you undergo the surgery in an inpatient setting again next time?                                                                                                                                   | Yes | No |
| 4. | Would you have preferred to have spend the night at home after the surgery?                                                                                                                                                            | Yes | No |
| 5. | Would you have preferred to have spend the night prior to the operation at home?                                                                                                                                                       | Yes | No |
| 6. | Were you content with the hospital admittance in general?                                                                                                                                                                              | Yes | No |
| 7. | <p>How easy or difficult was the first night after the operation on a scale from 0 to 10 (0 is very easy and 10 is as difficult as possible)?</p>  |     |    |
